# Supplementary material for: ESIPT-based fluorescence probe for the rapid detection of peroxynitrite ‘AND’ biological thiols
Source: Royal Society of Chemistry journal article supplement (doi:10.1039/c8cc06917d), 2018-01-01
Supplement: c8cc06917d1.pdf [file c8cc06917d1.pdf]

# **ESIPT-based fluorescence probe for the rapid detection of peroxynitrite ‘AND’ biological thiols**

Luling Wu,<sup>a‡</sup> Hai-Hao Han,<sup>b‡</sup> Liyuan Liu,<sup>a</sup> Jordan E. Gardiner,<sup>a</sup> Adam C. Sedgwick,<sup>ac</sup> Chusen Huang,<sup>d\*</sup> Steven D. Bull,<sup>a\*</sup> Xiao-Peng He,<sup>b\*</sup> and Tony D. James<sup>a\*</sup>

<sup>a</sup>Department of Chemistry, University of Bath, Bath, BA2 7AY, UK.

<sup>b</sup>Key Laboratory for Advanced Materials and Joint International Research Laboratory of Precision Chemistry and Molecular Engineering, Feringa Nobel Prize Scientist Joint Research Center, School of Chemistry and Molecular Engineering, East China University of Science and Technology, 130 Meilong Rd., Shanghai 200237, China.

<sup>c</sup>Department of Chemistry, University of Texas at Austin, 105 E 24th street A5300, Austin, TX 78712-1224 (USA)

<sup>d</sup>The Education Ministry Key Laboratory of Resource Chemistry, Shanghai Key Laboratory of Rare Earth Functional Materials, and Shanghai Municipal Education Committee Key Laboratory of Molecular Imaging Probes and Sensors, Department of Chemistry, Shanghai Normal University, 100 Guilin Road, Shanghai 200234, China. *Email:*

<sup>‡</sup>Equal contribution

**Email:** huangcs@shnu.edu.cn; s.d.bull@bath.ac.uk; xphe@ecust.edu.cn;  
t.d.james@bath.ac.uk,

## **Table of Contents**

- 1. Design concept for AND logic based fluorogenic probe**
- 2. Experimental**
- 3. Generation of various ROS**
- 4. UV-Vis Analysis and fluorescence of GSH-ABAH**
- 5. Mass spec analysis of GSH-ABAH**
- 6. Detailed protocols for cell culture**
- 7. Fluorescence imaging in live cells with GSH-ABAH**
- 8. NMR spectrum**
- 9. References**

## 1. Design concept for AND logic based fluorogenic probe

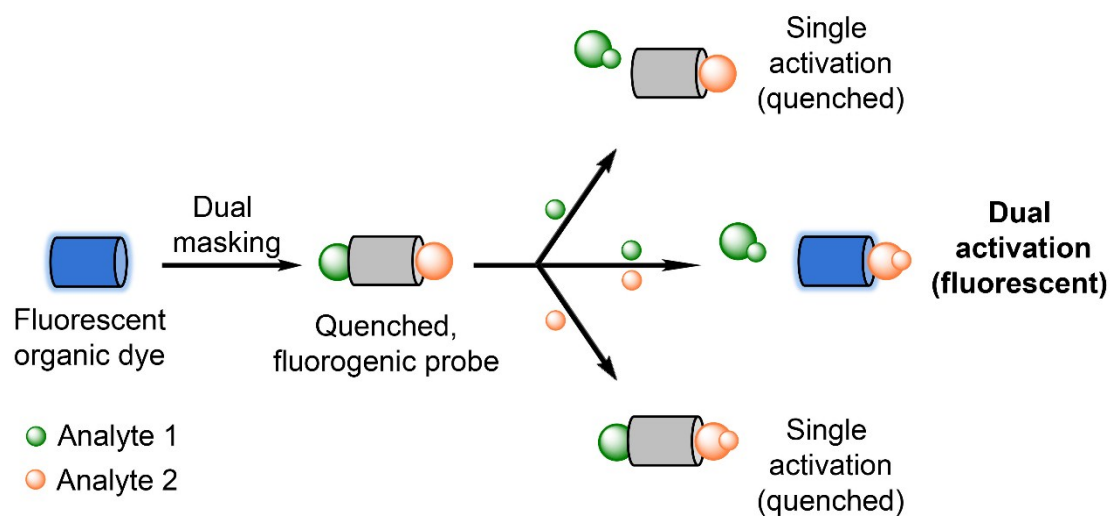

**Scheme S1** Design concept for AND logic based fluorogenic probe. A fluorescence dye is masked by two functional groups, which respond to two different analytes. The fluorogenic probe requires both analytes to be present or to work in tandem in order to produce a response.

## 2. Experimental

### 2.1. Synthetic experiments: material and apparatus

All chemical reagents and solvents were purchased from commercial sources and used without further purification. Thin-layer chromatography (TLC) was performed on silica gel plates and visualized by UV. Column chromatography was performed using silica gel (Sigma-Aldrich) 200-400 mesh.  $^1\text{H}$  and  $^{13}\text{C}$  NMR spectra were recorded employing a Bruker AV-500 spectrometer with chemical shifts expressed in parts per million (in  $\text{DMSO-}d_6$ ,  $\text{CDCl}_3$ ,  $\text{Me}_4\text{Si}$  as internal standard). Electrospray ionization (ESI) mass spectrometry was performed using a Bruker MicrTOF spectrometer.

### 2.2. Synthetic experiments: synthetic procedures

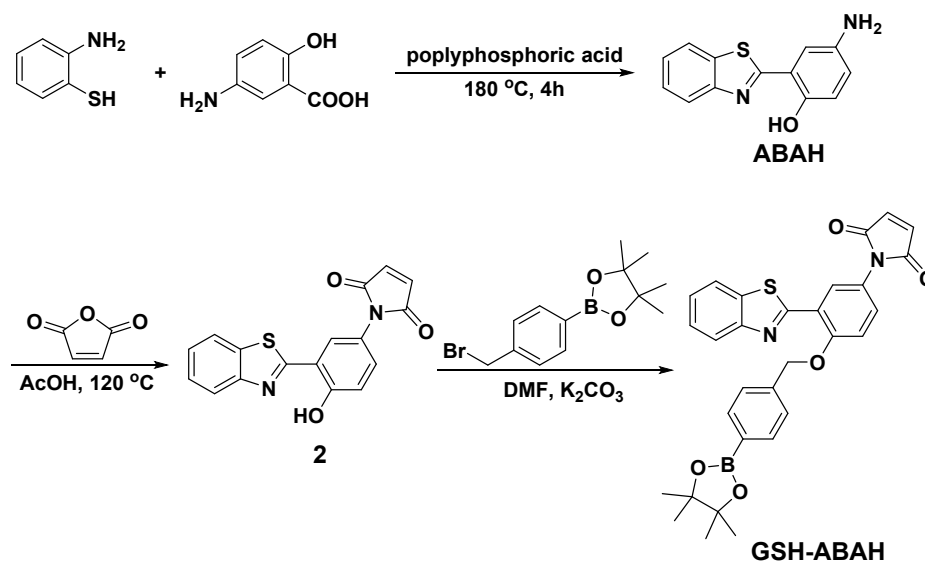

**Scheme S2.** Synthesis of target probe GSH-ABAH.

#### 4-amino-2-(benzo[d]thiazol-2-yl)phenol (ABAH).

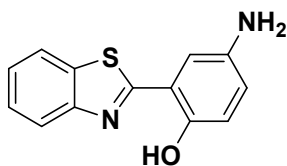

**ABAH** was synthesized according to the similar procedures.<sup>1, 2</sup> In brief, a mixture of 2-aminothiophenol (1.00 g, 8.0 mmol) and 5-aminosalicylic acid (1.23 g, 8.0 mmol) was stirred in 30 mL polyphosphoric acid (PPA) at 185 °C for 4 h. Then the reaction mixture was poured into cold water to give a yellow precipitate. After filtering, the yellow precipitate was washed by 10% Na<sub>2</sub>CO<sub>3</sub> and the product changes to green (1.27 g, 66% yield). <sup>1</sup>H NMR (500 MHz, DMSO-*d*<sub>6</sub>) δ 8.11 (d, *J* = 8.0 Hz, 1H), 8.02 (d, *J* = 8.1 Hz, 1H), 7.72 (d, *J* = 15.1 Hz, 1H), 7.52 (t, *J* = 7.7 Hz, 1H), 7.42 (t, *J* = 7.6 Hz, 1H), 7.01 (d, *J* = 8.5 Hz, 1H), 6.95 (d, *J* = 8.4 Hz, 1H). <sup>13</sup>C NMR (125 MHz, DMSO-*d*<sub>6</sub>) δ 165.64 (s), 151.94 (s), 150.46 (s), 134.77 (s), 126.87 (s), 125.44 (s), 122.80 (s), 122.45 (s), 122.39 (s), 118.77 (s), 118.14 (s), 117.18 (s), 115.56 (s). HRMS (ES<sup>+</sup>): calc. for C<sub>13</sub>H<sub>10</sub>N<sub>2</sub>OS [M+H]<sup>+</sup> 243.0587, found 243.0577.

#### 1-(3-(benzo[d]thiazol-2-yl)-4-hydroxyphenyl)-1H-pyrrole-2,5-dione (compound 2).

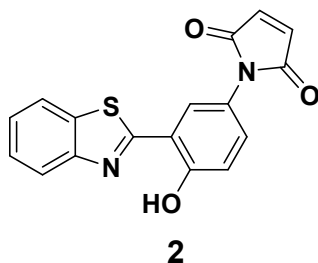

Compound **2** was synthesized according to the reported procedures<sup>2</sup>. A mixture of **ABAH** (0.97 g, 4 mmol) and maleic anhydride (0.45 g, 5.0 mmol) in glacial acetic acid (40 mL) was heated under reflux for 4 h. The reaction mixture was left to cool, and poured into 150 mL cold water to give a yellow precipitate. The yellow solid obtained was filtered and washed with sodium carbonate solution. After drying, the residue was purified by silica gel chromatography using CH<sub>2</sub>Cl<sub>2</sub> as the eluent to give **2** as a yellow solid (0.99 g, 77%). <sup>1</sup>H NMR (500 MHz, DMSO-*d*<sub>6</sub>) δ 11.75 (s, 1H), 8.20 (d, *J* = 2.6 Hz, 1H), 8.15 (d, *J* = 7.5 Hz, 1H), 8.04 (d, *J* = 8.1 Hz, 1H), 7.58 – 7.51 (m, 1H), 7.48 – 7.41 (m, 1H), 7.34 (dd, *J* = 8.7, 2.6 Hz, 1H), 7.23 – 7.08 (m, 3H). <sup>13</sup>C NMR (125 MHz, DMSO-*d*<sub>6</sub>) δ 170.64 (s), 163.84 (s), 151.82 (s), 151.77 (s), 135.32 (s), 135.11 (s), 131.42 (s), 127.44 (s), 126.89 (s), 125.53 (s), 122.67 (s), 122.48 (s), 119.53 (s), 117.74 (s), 109.99 (s). HRMS (ES<sup>+</sup>): calc. for C<sub>17</sub>H<sub>10</sub>N<sub>2</sub>O<sub>3</sub>S [M+H]<sup>+</sup> 323.0485, found 323.0513.

**1-(3-(benzo[d]thiazol-2-yl)-4-((4-(4,4,5,5-tetramethyl-1,3,2-dioxaborolan-2-yl)benzyl)oxy)phenyl)-1H-pyrrole-2,5-dione (GSH-ABAH)**

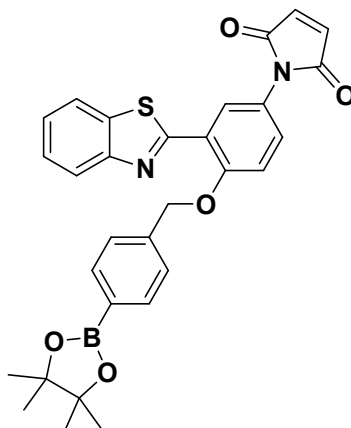

To a solution of compound **2** (0.65g, 2.02 mmol) in dry DMF 2-(4-(Bromomethyl)phenyl)-4,4,5,5-tetramethyl-1,3,2-dioxaborolane (0.72 g, 2.42 mmol) was added under an argon atmosphere, the reaction mixture was stirred for about 2 h, then the reaction mixture was concentrated under reduced pressure. The obtained crude product was purified by chromatography on silica gel eluting with petrol ether and ethyl acetate to afford a pale light yellow solid (293 mg, 27% yield).  $^1\text{H}$  NMR (500 MHz,  $\text{CDCl}_3$ )  $\delta$  8.55 (d,  $J = 2.7$  Hz, 1H), 8.06 (d,  $J = 8.1$  Hz, 1H), 7.89 (t,  $J = 8.7$  Hz, 3H), 7.55 (d,  $J = 8.0$  Hz, 2H), 7.50 – 7.46 (m, 1H), 7.39 – 7.33 (m, 2H), 7.16 (d,  $J = 8.9$  Hz, 1H), 6.87 (s, 2H), 5.39 (s, 2H), 1.37 (s, 12H).  $^{13}\text{C}$  NMR (126 MHz,  $\text{CDCl}_3$ ) 169.49 (s), 161.72 (s), 155.64 (s), 151.91 (s), 138.62 (s), 136.20 (s), 135.16 (s), 134.22 (s), 129.46 (s), 127.86 (s), 126.97 (s), 126.00 (s), 124.80 (s), 124.67 (s), 123.51 (s), 122.93 (s), 121.35 (s), 113.61 (s), 83.92 (s), 71.37 (s), 24.88 (s). HRMS ( $\text{ES}^+$ ): calc. for  $\text{C}_{30}\text{H}_{27}\text{BN}_2\text{O}_5\text{S}$   $[\text{M}+\text{H}]^+$  539.1796, found 539.1812.

### 3. Generation of various ROS

#### **ROO•**

ROO• was generated from 2,2'-azobis (2-amidinopropane) dihydrochloride. AAPH (2, 2'-azobis (2-amidinopropane) dihydrochloride, 1 M) was added into deionizer water, and then stirred at 37 °C for 30min.

#### **•O<sub>2</sub><sup>-</sup>**

Superoxide was generated from KO<sub>2</sub>. KO<sub>2</sub> and 18-crown-6 ether (2.5 eq) was dissolved in DMSO to afford a 0.25 M solution.

#### **•HO**

Hydroxyl radical was generated by the Fenton reaction. To prepare •OH solution, hydrogen peroxide (H<sub>2</sub>O<sub>2</sub>, 10 eq) was added to Fe(ClO<sub>4</sub>)<sub>2</sub> in deionised water.

<sup>1</sup>O<sub>2</sub>: NaMoO<sub>4</sub> (20 mM) and H<sub>2</sub>O<sub>2</sub> (20 mM) were prepared in deionized water. Equal aliquots of these two solutions were then mixed to yield <sup>1</sup>O<sub>2</sub> of 10 mM.

#### **ONOO<sup>-</sup>**

Simultaneously, 0.6 M KNO<sub>2</sub>, 0.6 M in HCl, 0.7 M in H<sub>2</sub>O<sub>2</sub> was added at to a 3 M NaOH solution at 0 °C. The concentration of peroxynitrite was estimated by using extinction coefficient of 1670 cm<sup>-1</sup> M<sup>-1</sup> at 302 nm in 0.1 M sodium hydroxide aqueous solutions.

#### **•OCl**

The concentration of •OCl was determined from the absorption at 292 nm ( $\epsilon = 350 \text{ M}^{-1} \text{ cm}^{-1}$ ).

#### **H<sub>2</sub>O<sub>2</sub>**

The concentration of H<sub>2</sub>O<sub>2</sub> was determined from the absorption at 240 nm ( $\epsilon = 43.6 \text{ M}^{-1} \text{ cm}^{-1}$ ).

#### 4. UV-Vis and fluorescence analysis of GSH-ABAH

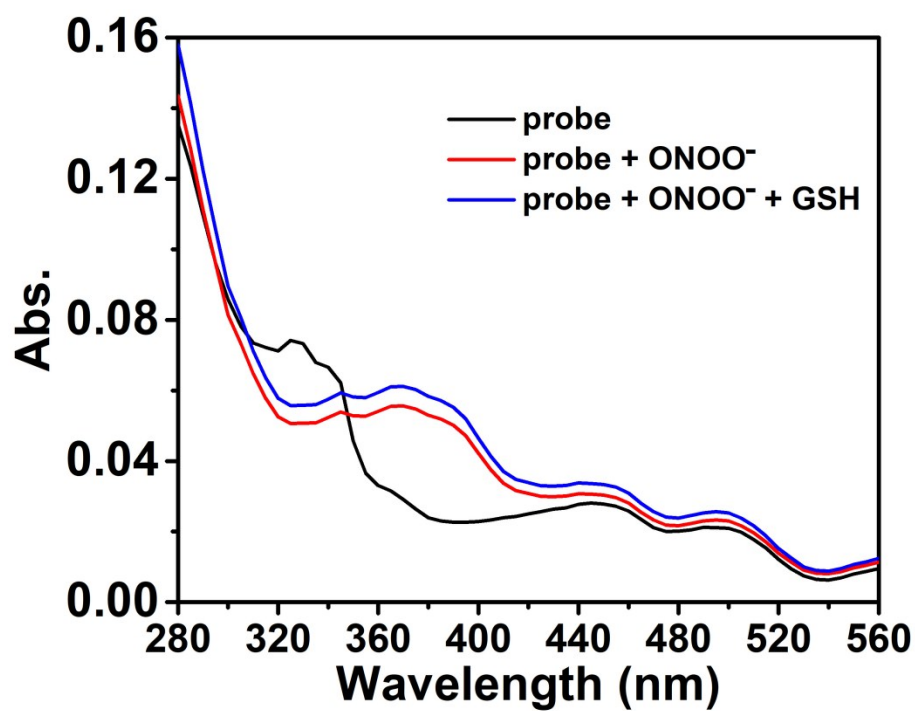

**Figure S1.** Absorption spectrum of **GSH-ABAH** (2 μM) with and without  $\text{ONOO}^-$  (4 μM), and **GSH-ABAH** (2 μM) with addition of  $\text{ONOO}^-$  (4 μM) wait 1 min then addition of GSH (2 μM) in in buffer solution [8% DMSO, 1 mM CTAB] (pH 8.20 at 25 °C).

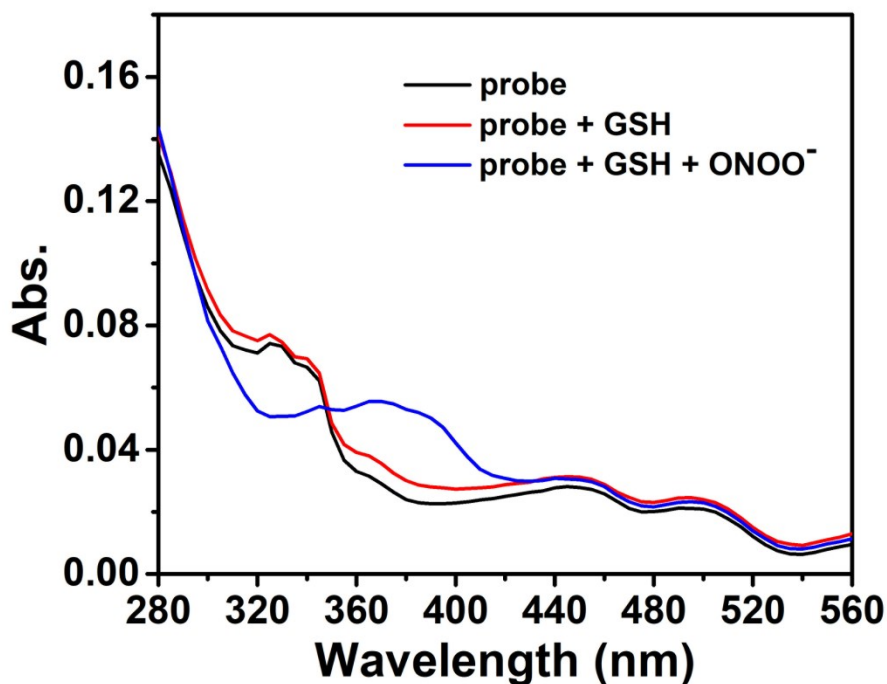

**Figure S2.** Absorption spectrum of **GSH-ABAH** (2  $\mu\text{M}$ ) with and without **GSH** (5  $\mu\text{M}$ ), and **GSH-ABAH** (2  $\mu\text{M}$ ) with addition of **GSH** (5  $\mu\text{M}$ ) wait 1 min then addition of **ONOO<sup>-</sup>** (14  $\mu\text{M}$ ) in in buffer solution [8% DMSO, 1 mM CTAB] (pH 8.20 at 25  $^{\circ}\text{C}$ ).

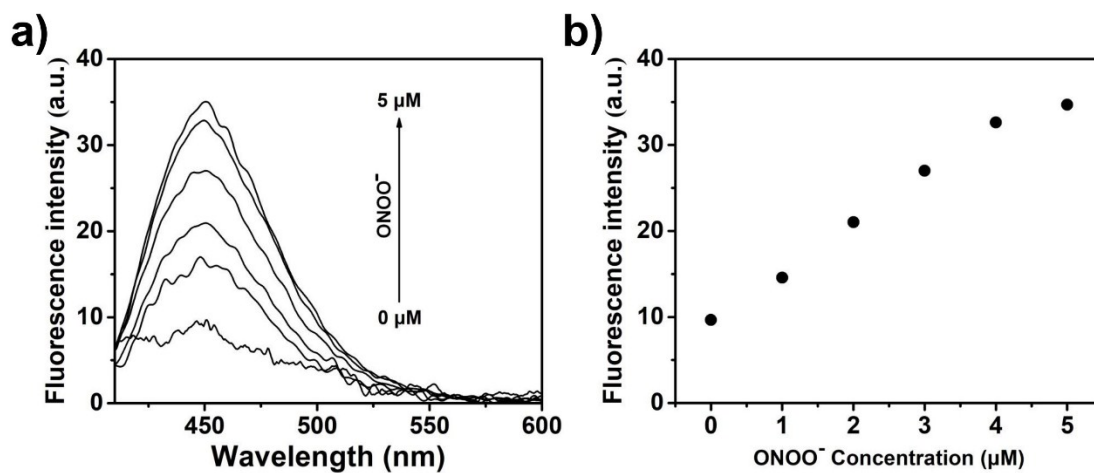

**Figure S3.** (a) Emission at 451 nm of **GSH-ABAH** (2  $\mu\text{M}$ ) with increasing addition of **ONOO<sup>-</sup>** (from 0 to 5  $\mu\text{M}$ ) in PBS buffer (pH 8.2, containing 8% DMSO, 1 mM CTAB) after 1 min.  $\lambda_{\text{ex}}$  = 390 nm. (b) A plot of fluorescence intensity changes (based on the peak heights at the maxima, 451 nm) depending on **ONOO<sup>-</sup>** concentration.  $\lambda_{\text{ex}}$  = 390 nm. Slit widths: ex = 4 nm, em = 4 nm.



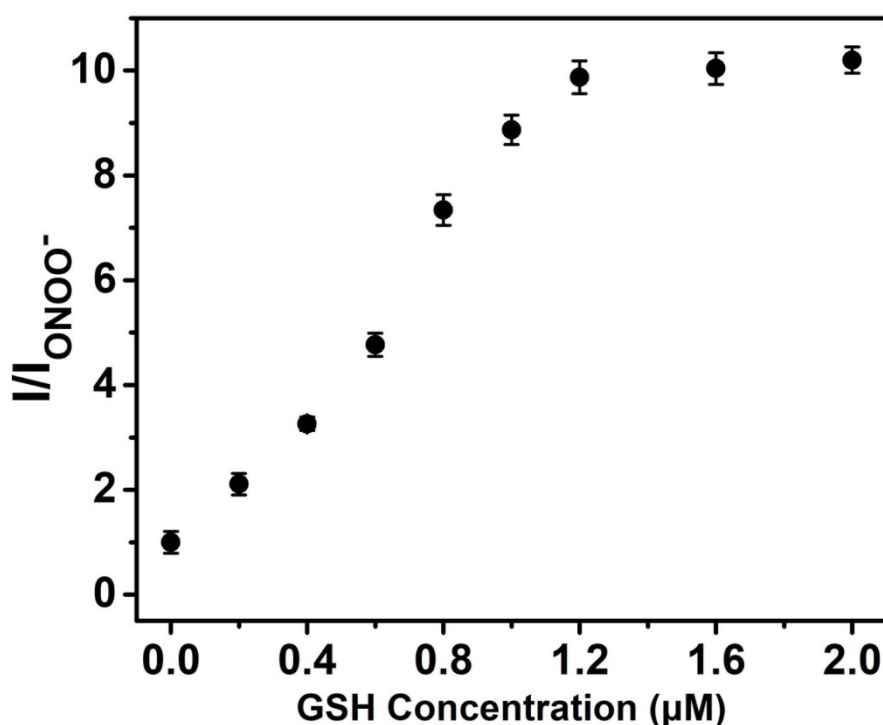

**Figure S4.** Fluorescence intensity changes ( $I/I_{\text{ONOO}^-}$ ) for **GSH-ABAH** (2  $\mu\text{M}$ ) with addition of  $\text{ONOO}^-$  (4  $\mu\text{M}$ ) followed by the addition of GSH (0 - 2  $\mu\text{M}$ ), 1 min wait between addition in buffer solution [8% DMSO, 1 mM CTAB]. pH = 8.20 at 25  $^{\circ}\text{C}$ . Fluorescence intensities were measured with  $\lambda_{\text{ex}} = 390 \text{ nm}$  /  $\lambda_{\text{em}} = 451 \text{ nm}$  with slit widths Ex slit: 4 nm and Em slit: 4 nm.

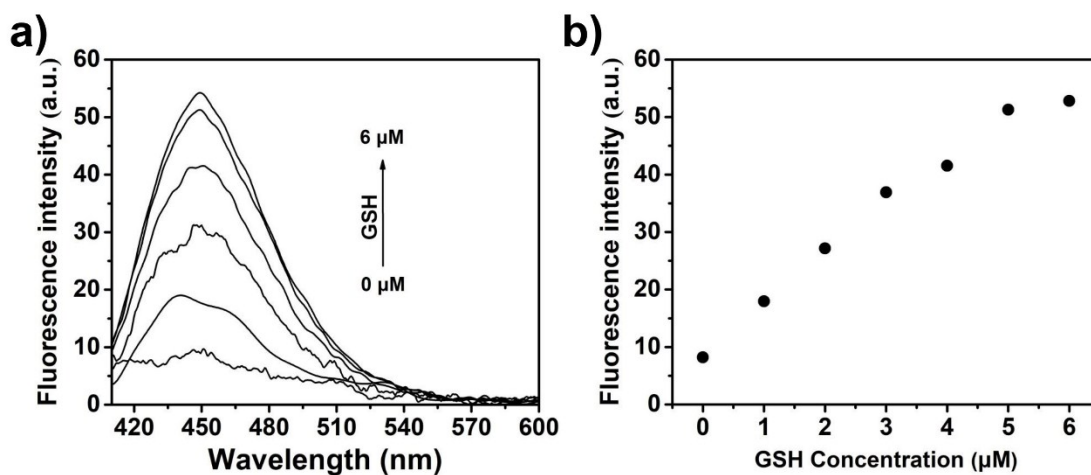

**Figure S5.** (a) Emission at 451 nm of **GSH-ABAH** (2  $\mu\text{M}$ ) with increasing addition of GSH (from 0 to 6  $\mu\text{M}$ ) in PBS buffer (pH 8.2, containing 8% DMSO, 1 mM CTAB) after 1 min.  $\lambda_{\text{ex}} = 390 \text{ nm}$ . (b) A plot of fluorescence intensity changes (based on the peak heights at the maxima, 451 nm) depending on GSH concentration.  $\lambda_{\text{ex}} = 390 \text{ nm}$ . Slit widths: ex = 4 nm, em = 4 nm.

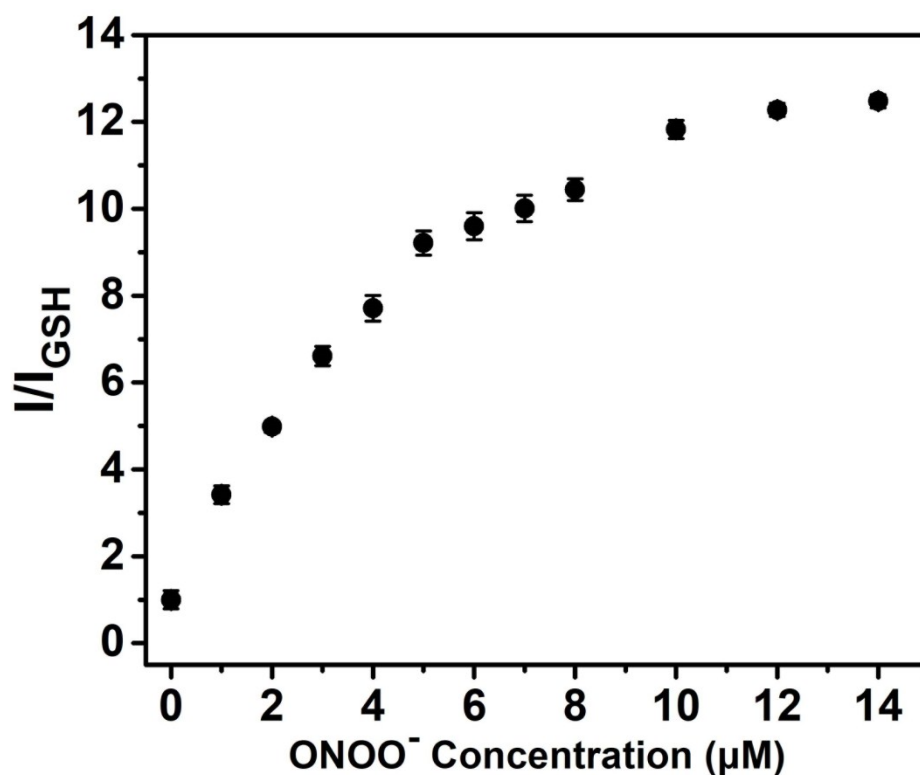

**Figure S6.** Fluorescence intensity changes ( $I/I_{\text{GSH}}$ ) for **GSH-ABAH** (2  $\mu\text{M}$ ) with addition of GSH (5  $\mu\text{M}$ ) followed by the addition of  $\text{ONOO}^-$  (0 - 14  $\mu\text{M}$ ), 1 min wait between addition in buffer solution [8% DMSO, 1 mM CTAB]. pH = 8.20 at 25 °C. Fluorescence intensities were measured with  $\lambda_{\text{ex}} = 390 \text{ nm}$ /  $\lambda_{\text{em}} = 451 \text{ nm}$  with slit widths Ex slit: 4 nm and Em slit: 4 nm.

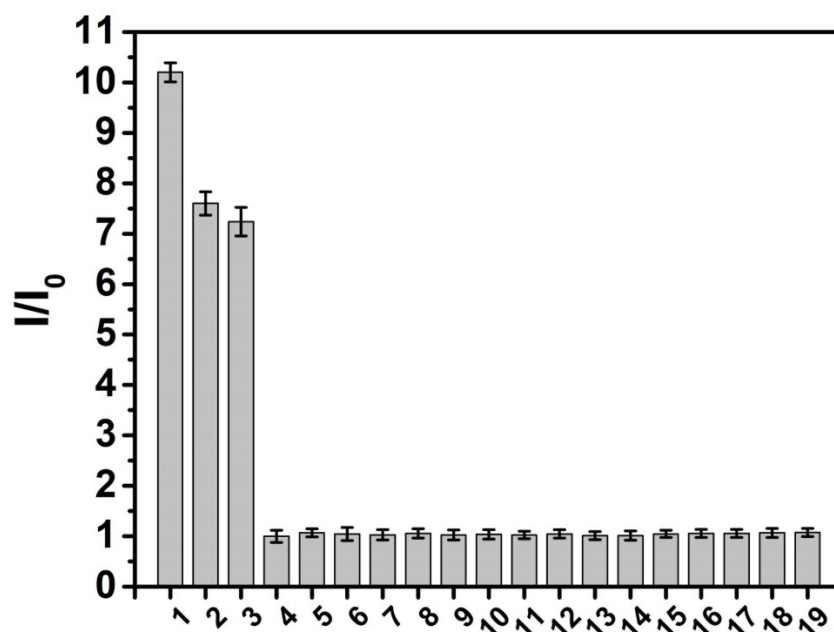

**Figure S7.** Selectivity bar chart of **GSH-ABAH** (2 μM) with addition of  $\text{ONOO}^-$  (4 μM) then addition of various amino acids – 50 μM (1 – GSH (4 μM), 2 – Cys (4 μM), 3 – Hcy (4 μM), 4 – Blank, 5 – Ala, 6 – Asn, 7 – Arg, 8 – Asp, 9 – Glu, 10 – Gln, 11 – Gly, 12 – Leu, 13 – Lys, 14 – Met, 15 – Phe, 16 – Pro, 17 – Ser, 18 – Thr, 19 – Trp). 2 min wait before measurement in buffer solution [8% DMSO, 1 mM CTAB] (pH 8.20 at 25 °C). Fluorescence intensities were measured with  $\lambda_{\text{ex}} = 390 \text{ nm}$  /  $\lambda_{\text{em}} = 451 \text{ nm}$  with slit widths ex slit: 4 nm and em slit: 4 nm.

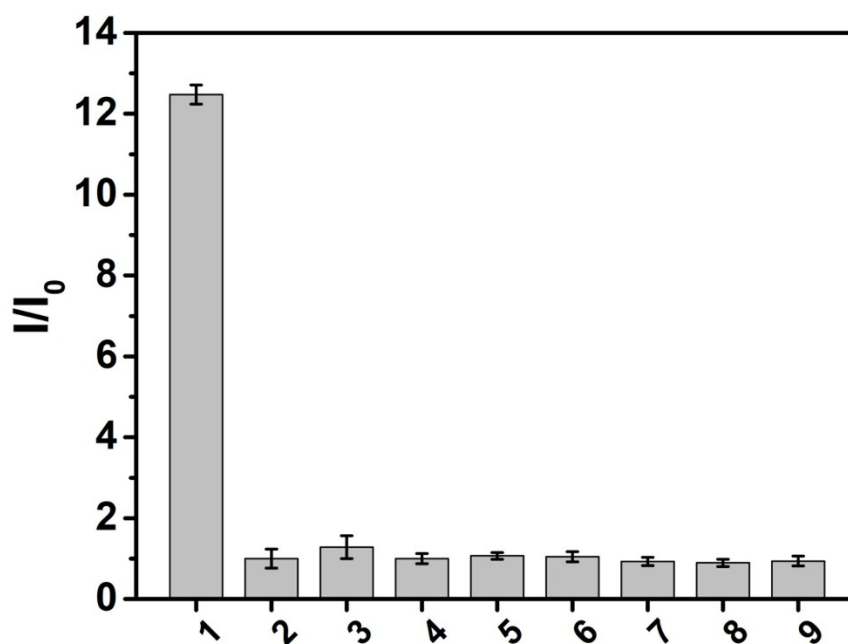

**Figure S8.** Selectivity bar chart of **GSH-ABAH** (2  $\mu\text{M}$ ) with addition of GSH (5  $\mu\text{M}$ ) wait 2 min then addition of various ROS –100  $\mu\text{M}$  (1 –  $\text{ONOO}^-$ , 2 – blank, 3 –  $\text{ClO}^-$ , 4 –  $\text{H}_2\text{O}_2$ , 5 –  $\bullet\text{OH}$ , 6 –  $\bullet\text{O}_2^-$ , 7 –  $^1\text{O}_2$ , 8.  $\text{ROO}\bullet$ , 9.  $\text{NO}$ ). 1 min wait before measurement in buffer solution [8% DMSO, 1 mM CTAB] (pH 8.20 at 25  $^\circ\text{C}$ ). Fluorescence intensities were measured with  $\lambda_{\text{ex}} = 390 \text{ nm}$ /  $\lambda_{\text{em}} = 451 \text{ nm}$  with slit widths ex slit: 4 nm and em slit: 4 nm.

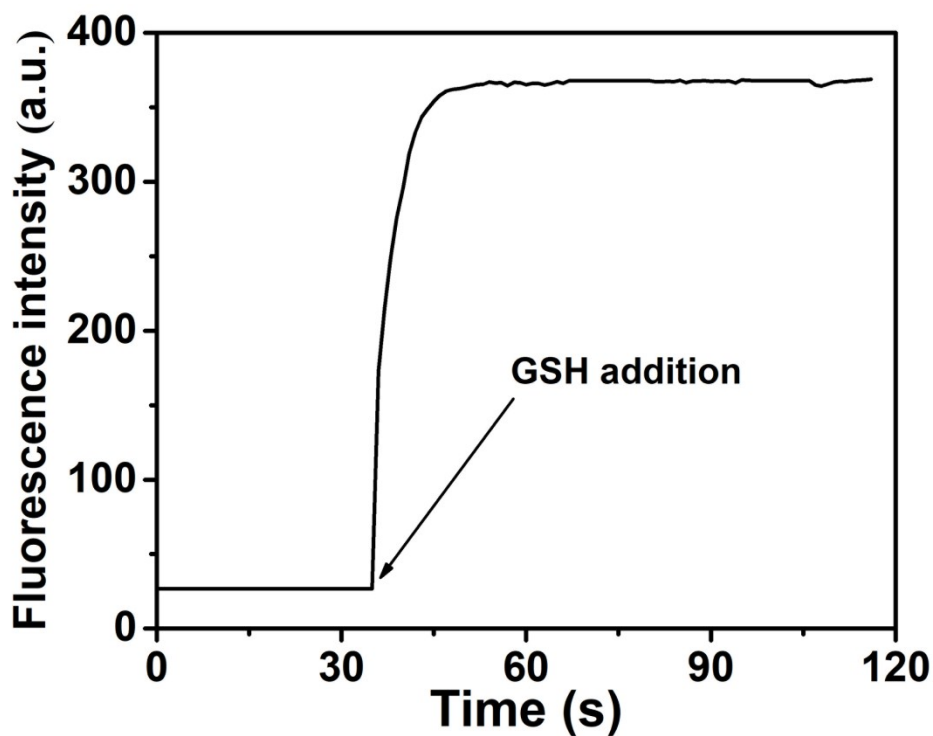

**Figure S9.** Fluorescence intensity over time of **GSH-ABAH** (2  $\mu\text{M}$ ) with  $\text{ONOO}^-$  (4  $\mu\text{M}$ ), followed by the addition of GSH (2  $\mu\text{M}$ ) in buffer solution [8% DMSO, 1 mM CTAB] (pH 8.20 at 25  $^{\circ}\text{C}$ ).  $\lambda_{\text{ex}} = 390 \text{ nm}$ /  $\lambda_{\text{em}} = 451 \text{ nm}$ .

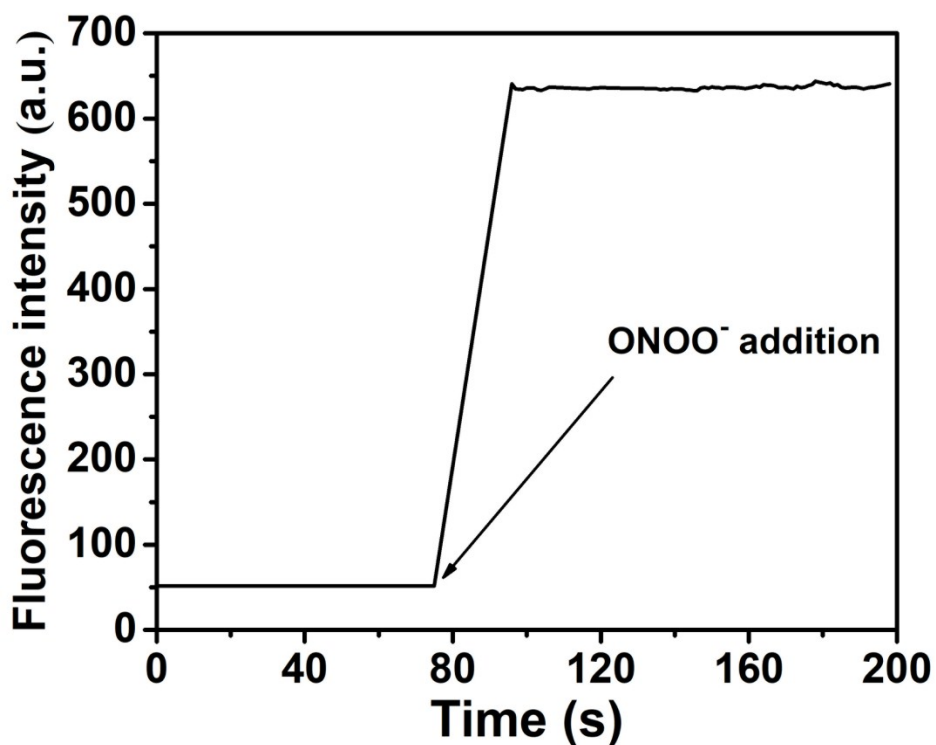

**Figure S10.** Fluorescence intensity over time of **GSH-ABAH** (2  $\mu\text{M}$ ) with GSH (5  $\mu\text{M}$ ), followed by the addition of  $\text{ONOO}^-$  (14  $\mu\text{M}$ ) in buffer solution [8% DMSO, 1 mM CTAB] (pH 8.20 at 25  $^{\circ}\text{C}$ ).  $\lambda_{\text{ex}} = 390 \text{ nm}$ /  $\lambda_{\text{em}} = 451 \text{ nm}$ .

## 5. Mass spec analysis of GSH-ABAH

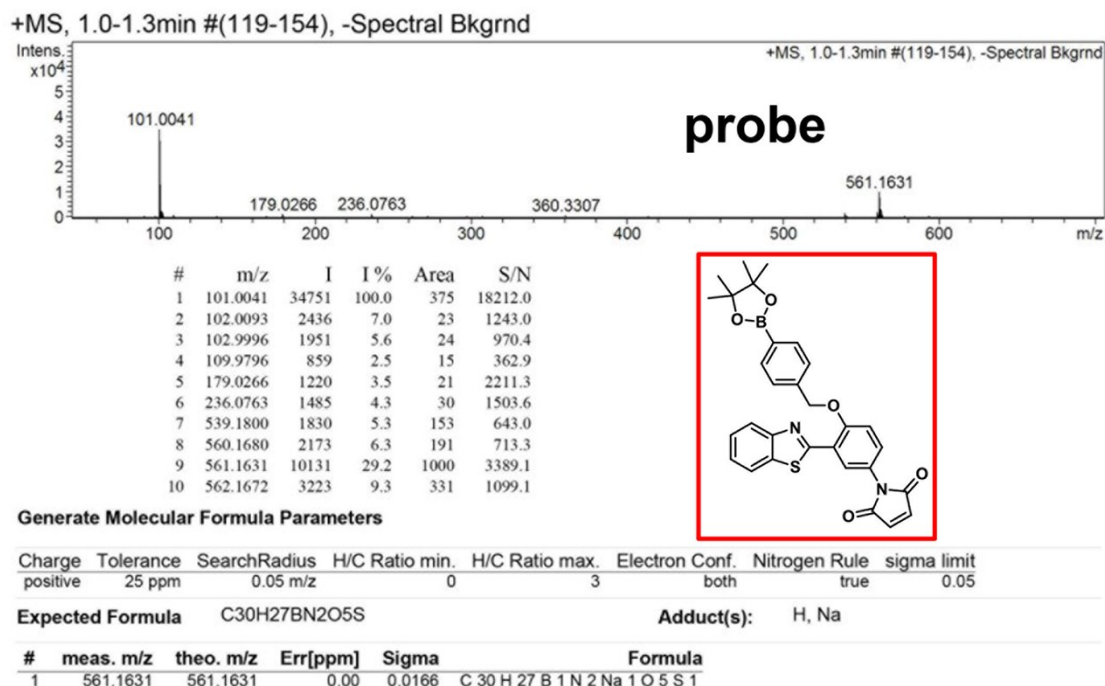

Figure S11. HRMS spectrum of probe GSH-ABAH before the addition of analyte.

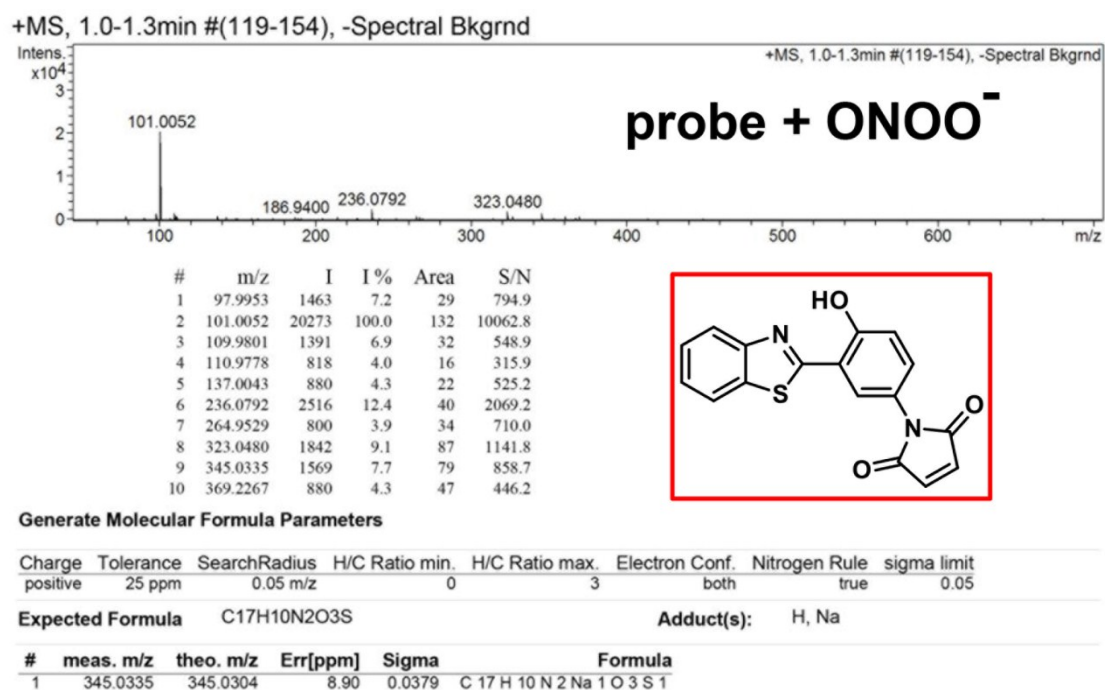

Figure S12. HRMS spectrum of GSH-ABAH + ONOO<sup>-</sup>.

+MS, 1.0-1.3min #(119-154), -Spectral Bkgrnd

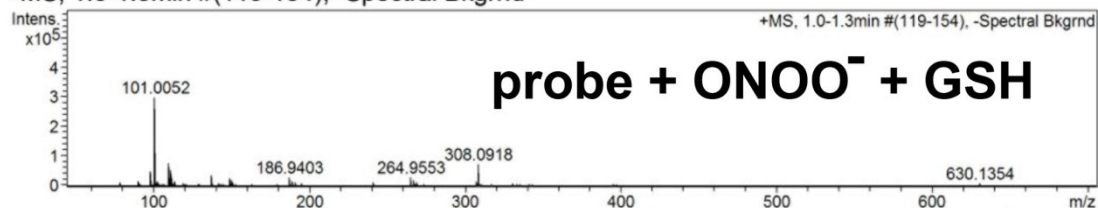

| #  | m/z      | I      | I %   | Area | S/N    |
|----|----------|--------|-------|------|--------|
| 1  | 97.9951  | 50361  | 17.0  | 1079 | 662.1  |
| 2  | 101.0052 | 295600 | 100.0 | 5404 | 3589.9 |
| 3  | 109.9797 | 77579  | 26.2  | 1861 | 767.2  |
| 4  | 110.9782 | 52094  | 17.6  | 1220 | 505.2  |
| 5  | 111.9775 | 31961  | 10.8  | 738  | 313.7  |
| 6  | 137.0031 | 36319  | 12.3  | 1038 | 511.0  |
| 7  | 148.9860 | 24228  | 8.2   | 729  | 430.1  |
| 8  | 186.9403 | 27272  | 9.2   | 927  | 992.7  |
| 9  | 264.9553 | 27729  | 9.4   | 1330 | 1056.1 |
| 10 | 308.0918 | 72138  | 24.4  | 3873 | 1754.8 |

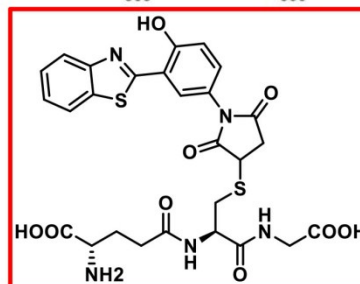

Generate Molecular Formula Parameters

| Charge   | Tolerance | SearchRadius | H/C Ratio min. | H/C Ratio max. | Electron Conf. | Nitrogen Rule | sigma limit |
|----------|-----------|--------------|----------------|----------------|----------------|---------------|-------------|
| positive | 25 ppm    | 0.05 m/z     | 0              | 3              | both           | true          | 0.05        |

Expected Formula C<sub>27</sub>H<sub>27</sub>N<sub>5</sub>O<sub>9</sub>S<sub>2</sub>

Adduct(s): H, Na

| # | meas. m/z | theo. m/z | Err[ppm] | Sigma  | Formula                                                                      |
|---|-----------|-----------|----------|--------|------------------------------------------------------------------------------|
| 1 | 630.1354  | 630.1323  | 4.90     | 0.0228 | C <sub>27</sub> H <sub>28</sub> N <sub>5</sub> O <sub>9</sub> S <sub>2</sub> |

**Figure S13.** HRMS spectrum of GSH-ABAH + ONOO<sup>-</sup> + GSH followed by addition of GSH.

## 6. Detailed protocols for cell culture

Cell culture. RAW 264.7 cells were maintained in a Dulbecco's Modified Eagle's Medium (Invitrogen, Carlsbad, CA, USA) supplemented with 10% fetal bovine serum (Gibco, Gland Island, NY, USA) in a humidified atmosphere of 5% CO<sub>2</sub> and 95% air at 37 °C and split when the cells reached 90% confluency.

## 7. Fluorescence imaging in live cells and MTS assay

**Fluorescence imaging of cells.** Cells were seeded on a black 96-well microplate with optically clear bottom (Greiner bio-one, Germany) overnight. The cells were pre-incubated with N-ethylmaleimide (NEM, GSH scavenger) for 1 h. For SIN-1/GSH imaging experiments, the cells were incubated with **GSH-ABAH** (20 µM) for 30 min, followed by incubation with SIN-1 (500 µM), or GSH (300 µM), or the mixture of SIN-1 (500 µM) and GSH (300 µM) for 30 min. Then, cells were washed with PBS (phosphate buffered saline) three times. The fluorescence images were recorded using an Operetta high content imaging system (Perkinelmer, US) at an excitation wavelength of 360-400 nm and an emission wavelength of 410-480 nm and quantified and plotted by columbus analysis system (Perkinelmer, US).

**Confocal laser scanning microscopy.** Cells cultured in growth medium supplemented with 10% FBS were added to a 24-well microplate. Cells were maintained in a humidified atmosphere of 5% CO<sub>2</sub> and 95% air at 37 °C overnight, and then were pre-incubated with N-ethylmaleimide (NEM, GSH scavenger) for 1 h, the cells were incubated with **GSH-ABAH** (20 µM) for 30 min, followed by incubation with SIN-1 (500 µM), or GSH (300 µM), or the mixture of SIN-1 (500 µM) and GSH (300 µM) for 30 min. After three rinses with PBS, the fluorescence was detected and photographed with confocal laser scanning microscopy.



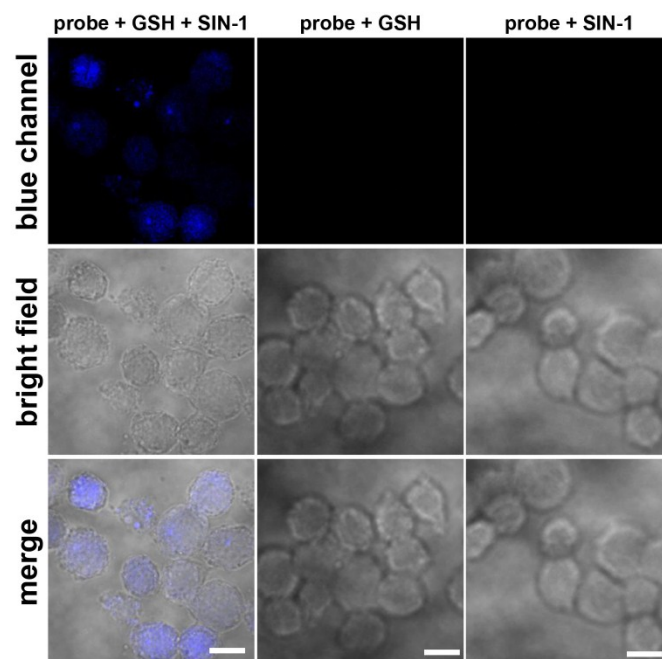

**Figure S14.** Confocal imaging of RAW264.7 cells with **GSH-ABAH** (20  $\mu$ M) in the presence of exogenously added GSH (300  $\mu$ M) and/or SIN-1 (500  $\mu$ M) with 1% DMSO. Excitation 405 nm, emission channel filtered = 410-480 nm. Scale bar = 10  $\mu$ m. Note: The cells were pre-incubated with N-ethylmaleimide (NEM, GSH scavenger)

**Cell viability assay.** Raw264.7 cells were seeded on a 96-well plate. After 24 h, cells were incubated with **GSH-ABAH** of different concentrations for 48 h. Then, the cell viabilities were determined through the MTS cell proliferation assay using 1% DMSO as the control.

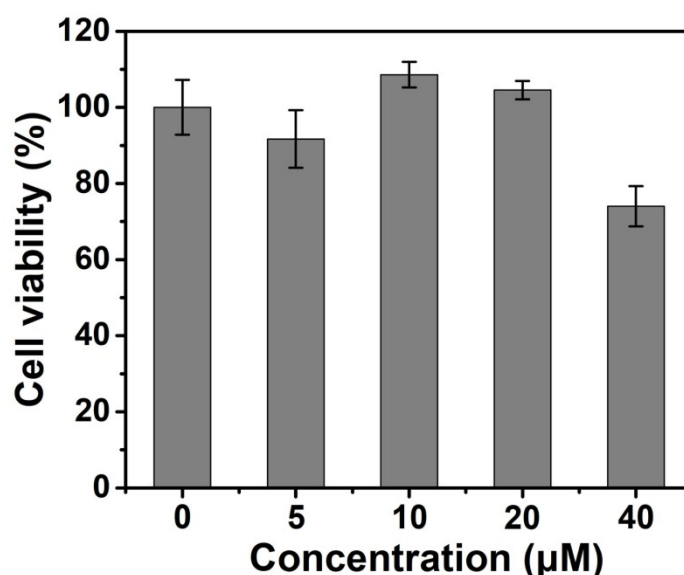

**Figure S15.** Cell toxicity of **GSH-ABAH** (from 0 to 40  $\mu$ M) when the incubation time was 48 h. Error bar represents s.d.

## 8. NMR spectrum

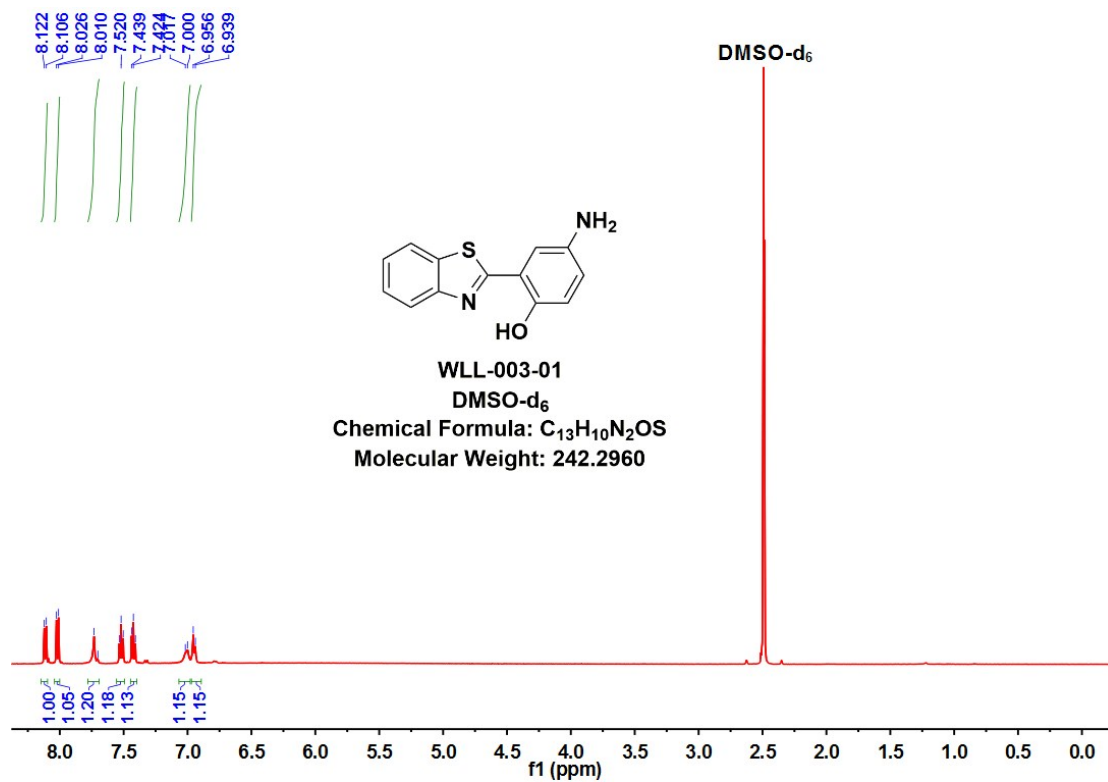

Figure S16. <sup>1</sup>H NMR spectrum of ABAH.

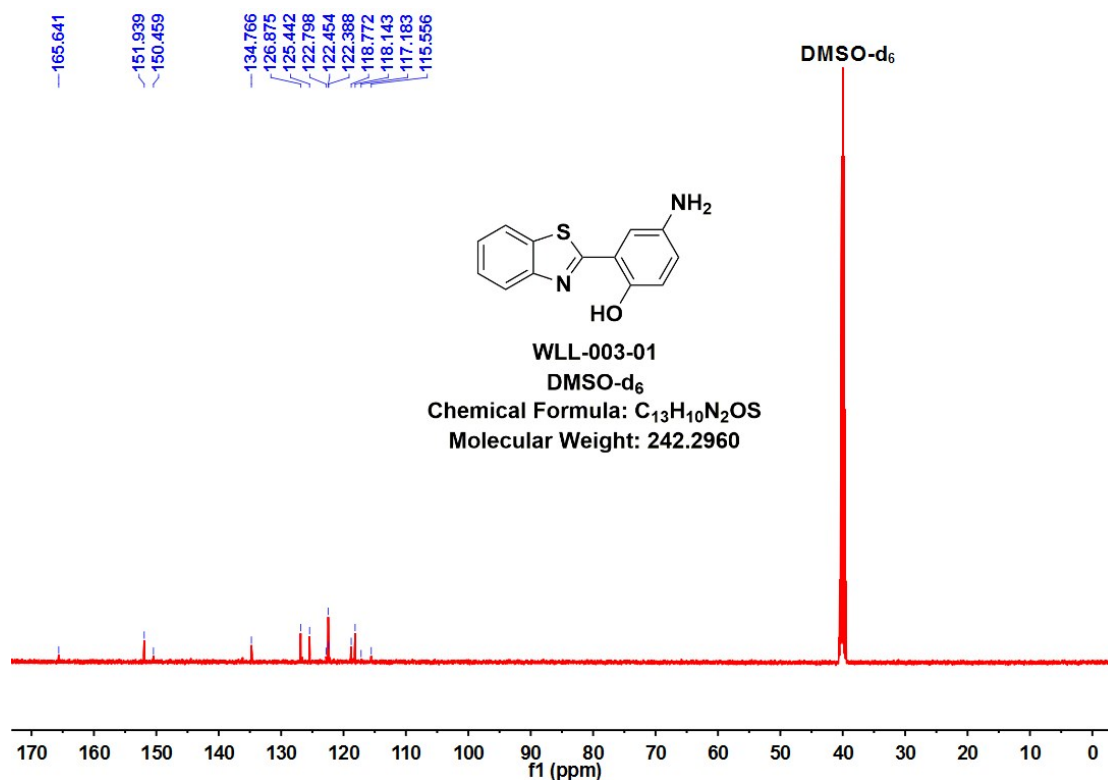

Figure S17. <sup>13</sup>C NMR spectrum of ABAH.

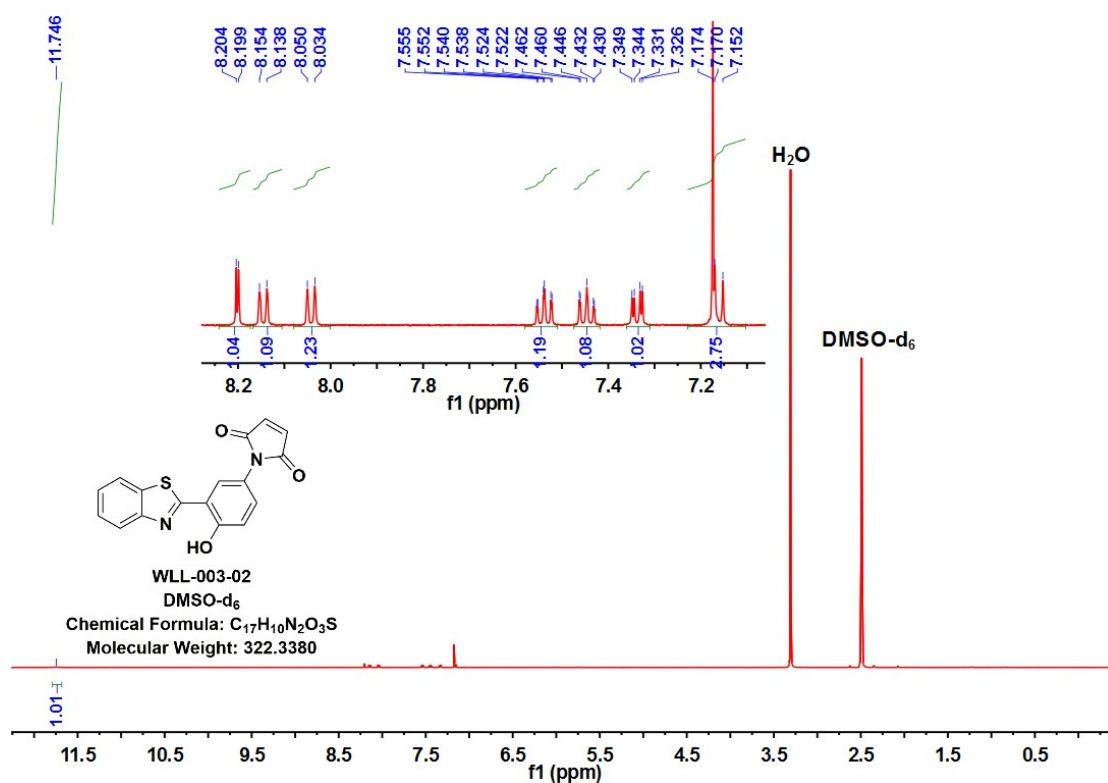

Figure S18. <sup>1</sup>H NMR spectrum of compound 2.

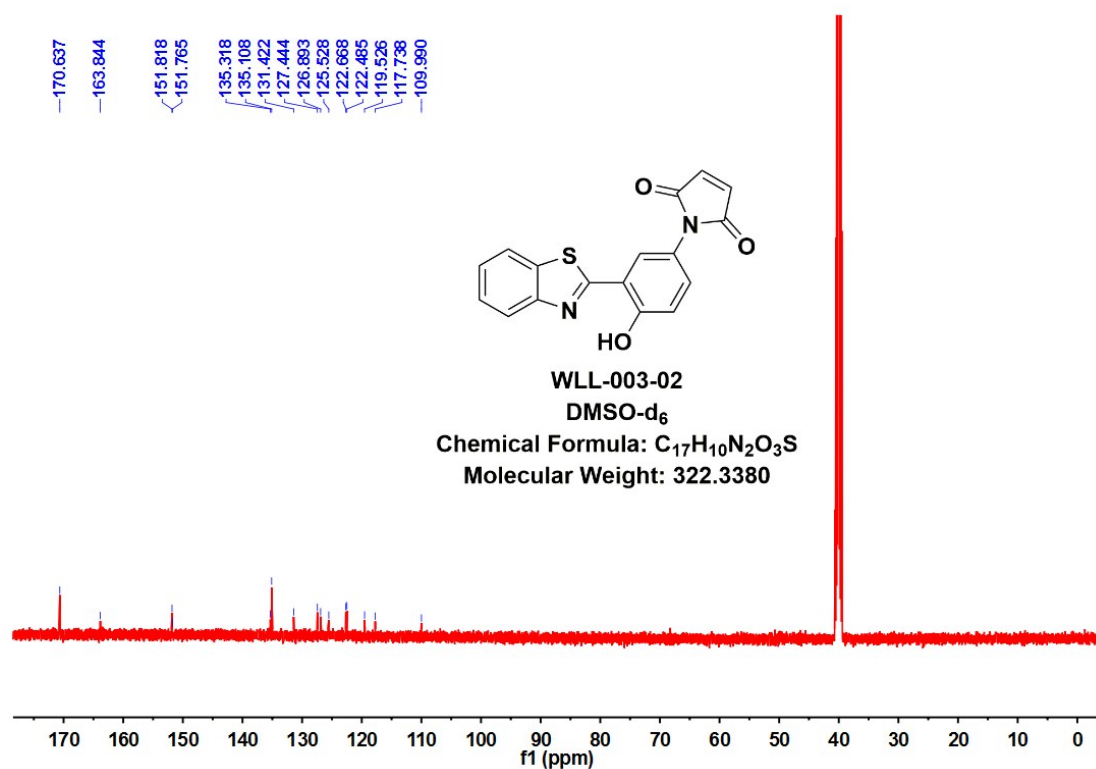

Figure S19. <sup>13</sup>C NMR spectrum of compound 2.

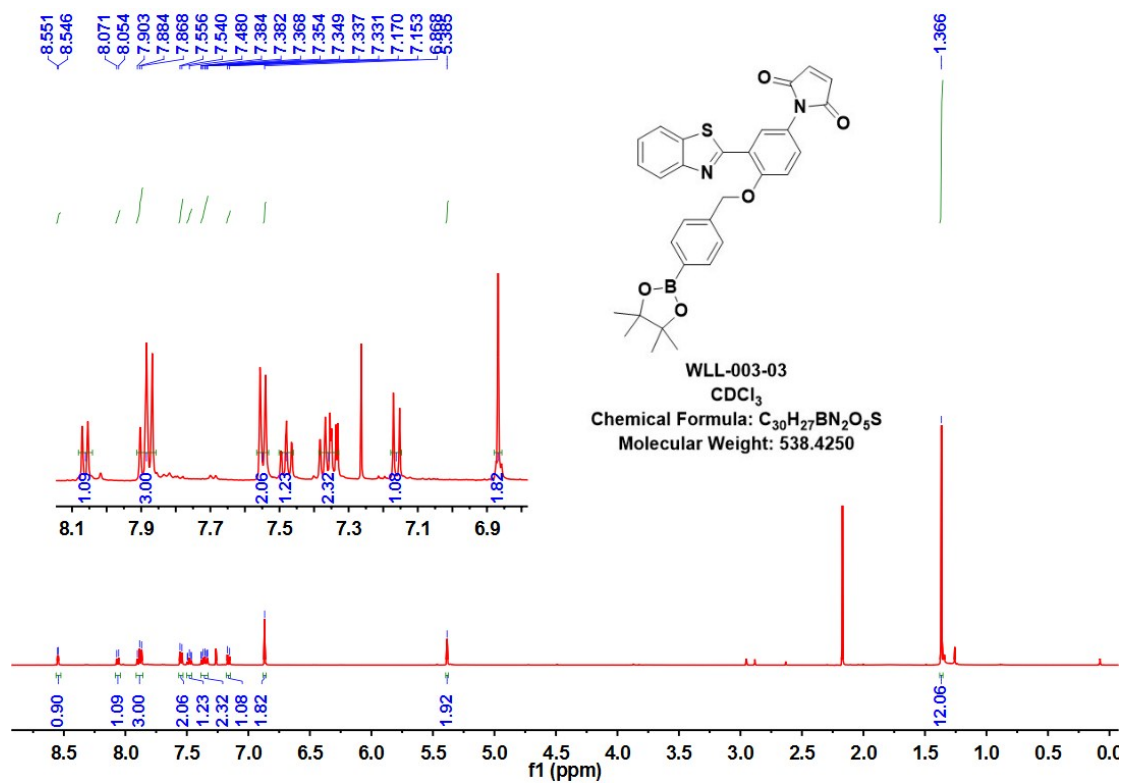

Figure S20. <sup>1</sup>H NMR spectrum of target probe GSH-ABAH.

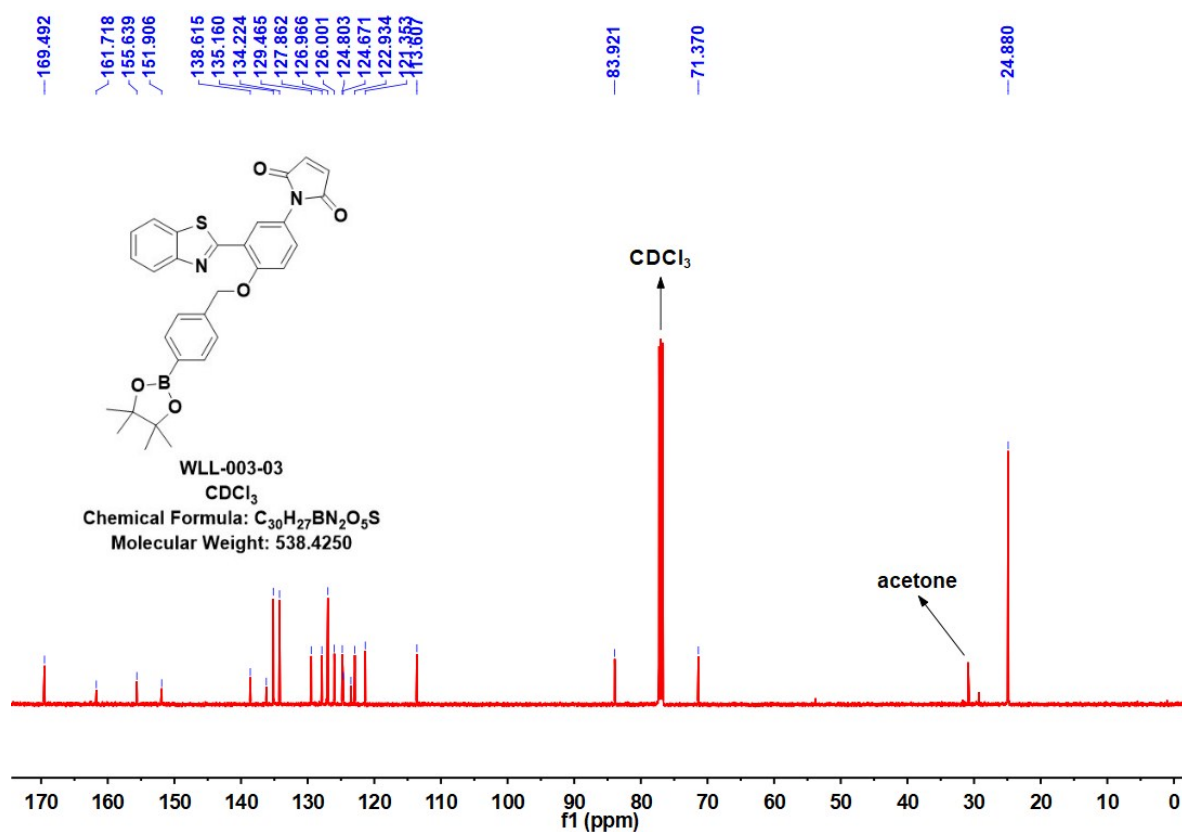

**Figure S21.**  $^{13}\text{C}$  NMR spectrum of target probe **GSH-ABAH**.

## 9. References

1. Cui, L.; Zhu, W.; Xu, Y.; Qian, X., A novel ratiometric sensor for the fast detection of palladium species with large red-shift and high resolution both in aqueous solution and solid state. *Analytica Chimica Acta* 2013, 786, 139-145.
2. Zhao, Y.; Xue, Y.; Li, H.; Zhu, R.; Ren, Y.; Shi, Q.; Wang, S.; Guo, W., An excited state intramolecular proton transfer dye based fluorescence turn-on probe for fast detection of thiols and its applications in bioimaging. *Spectrochimica Acta Part A: Molecular and Biomolecular Spectroscopy* 2017, 175, 215-221.
